# Supplementary material for: Construction of a novel isopinocamphone-based fluorescent probe for rapid and specific detection of ClO− and its application in environmental analysis and biological imaging
Source: Royal Society of Chemistry journal article supplement (doi:10.1039/d4nj02375g), 2024-01-01
Supplement: d4nj02375g1.pdf [file d4nj02375g1.pdf]

## Supplementary Material

### **Construction of a novel isopinocampone-based fluorescent probe for rapid and specific detection of ClO<sup>-</sup> and its application in environmental analysis and biological imaging**

Qian Ye, Kai Xu, Zhiyuan Meng, Xinyan Li, Zhonglong Wang\*, Shifa Wang\*

*Co-Innovation Center of Efficient Processing and Utilization of Forest Resources,  
International Innovation Center for Forest Chemicals and Materials, College of  
Chemical Engineering, Nanjing Forestry University, Nanjing, 210037, China*

\*Corresponding author: Dr. Zhonglong Wang, Email: [wang\\_zhonglong@njfu.edu.cn](mailto:wang_zhonglong@njfu.edu.cn)

\*Corresponding author: Dr. and Prof. Shifa Wang, Email: [wangshifa65@163.com](mailto:wangshifa65@163.com)

## Figures

**Fig. S1** Absorption spectra of probe **DMTI** (10  $\mu\text{M}$ ) before and after addition of  $\text{ClO}^-$ .

**Fig. S2** HRMS of **DMTI**.

**Fig. S3** Cytotoxicity assays of **DMTI** in living RAW264.7 cells.

**Fig. S4**  $^1\text{H}$  NMR spectra of **DMTI** in  $\text{DMSO-}d_6$ .

**Fig. S5**  $^{13}\text{C}$  NMR spectra of **DMTI** in  $\text{DMSO-}d_6$ .

**Fig. S6** Linear relationship between fluorescence intensity of **DMTI** at 460 nm against  $\text{ClO}^-$  concentration (0–140  $\mu\text{M}$ ) in distilled water (a), tap water (b), and lake water (c).

## **Experimental**

### **Materials and Instruments**

$^1\text{H}$  and  $^{13}\text{C}$  NMR spectra were conducted on AVANCE III HD 600 (Beijing, China). The high resolution mass spectra (HRMS) were recorded on Thermo Q-Exactive mass spectrometer (Beijing, China). The ultraviolet-visible spectra were measured with an UV-2450 spectrophotometer of Shimadzu Corporation (Japan), and fluorescence spectra were recorded by PerkinElmer LS-55 fluorescence spectrophotometer (Massachusetts, USA). The pH was measured by PHS-3C pH meter of Shanghai Leici (Shanghai, China).

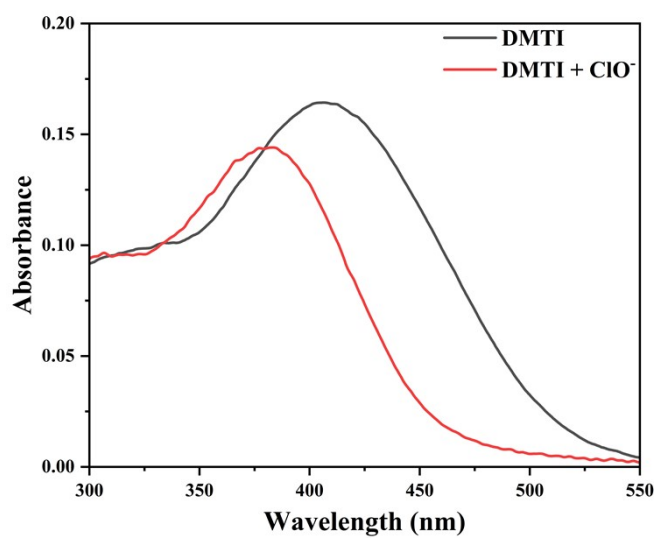

Fig. S1 Absorption spectra of probe DMTI (10  $\mu$ M) before and after addition of ClO<sup>-</sup>.

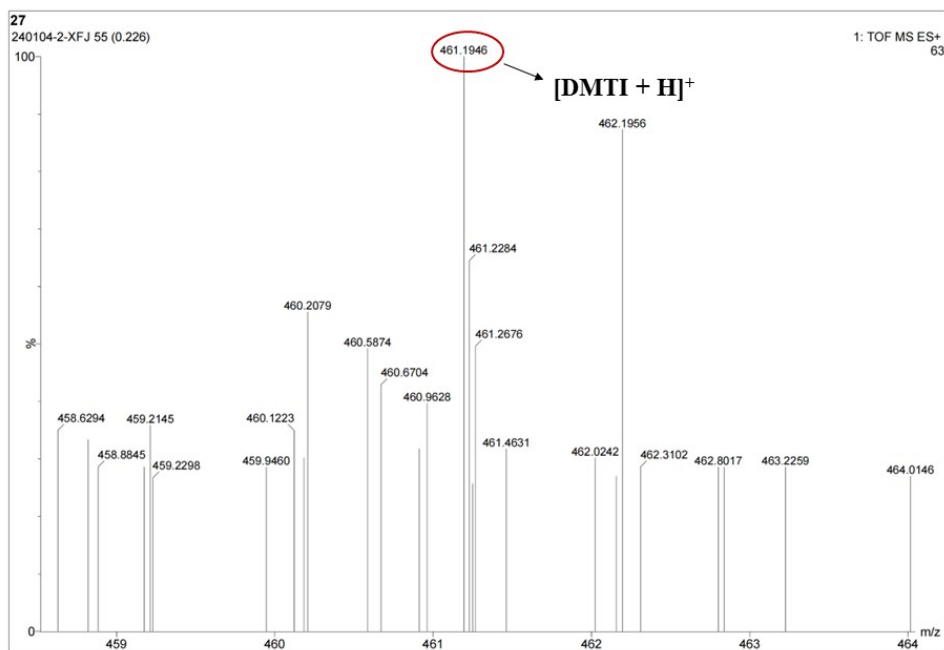

Fig. S2 HRMS of DMTI.

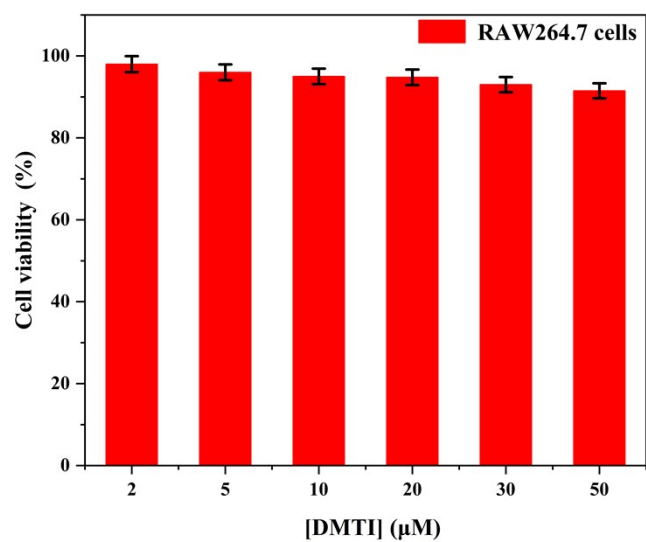

Fig. S3 Cytotoxicity assays of DMTI in living RAW264.7 cells.

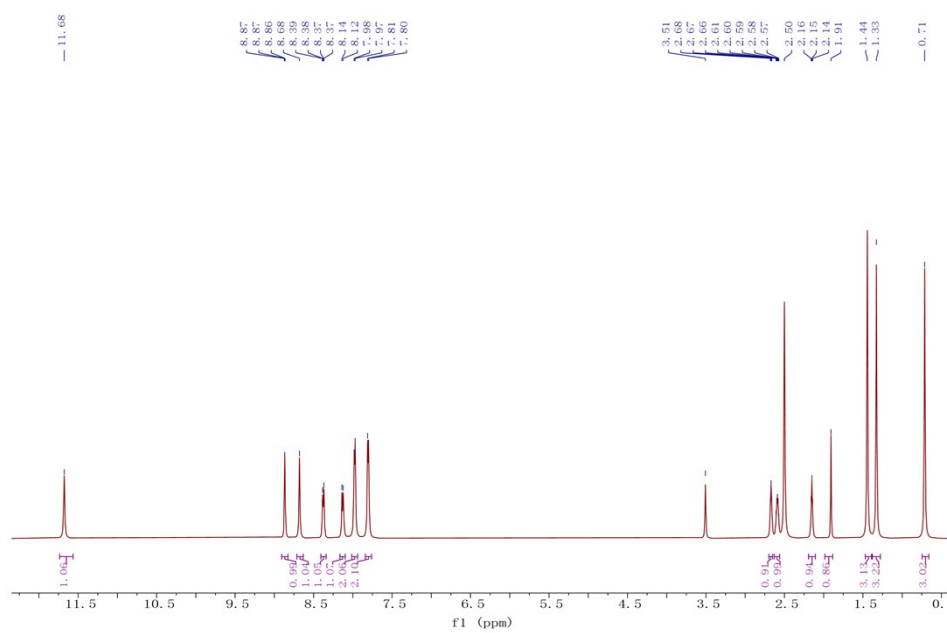

Fig. S4  $^1\text{H}$  NMR spectrum of DMTI in  $\text{DMSO-}d_6$ .

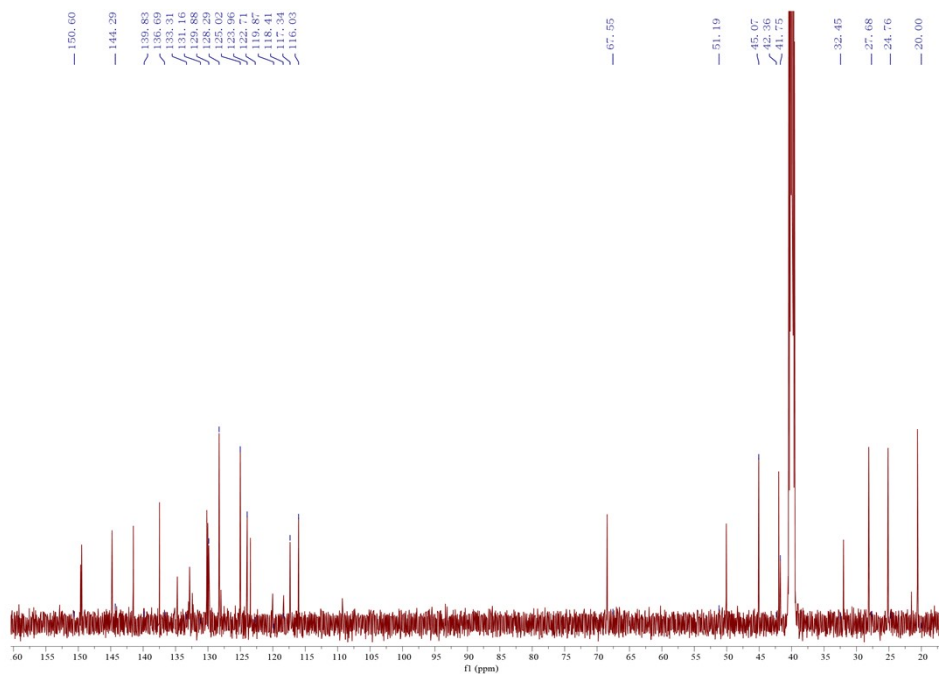

**Fig. S5**  $^{13}\text{C}$  NMR spectrum of **DMTI** in  $\text{DMSO-}d_6$ .

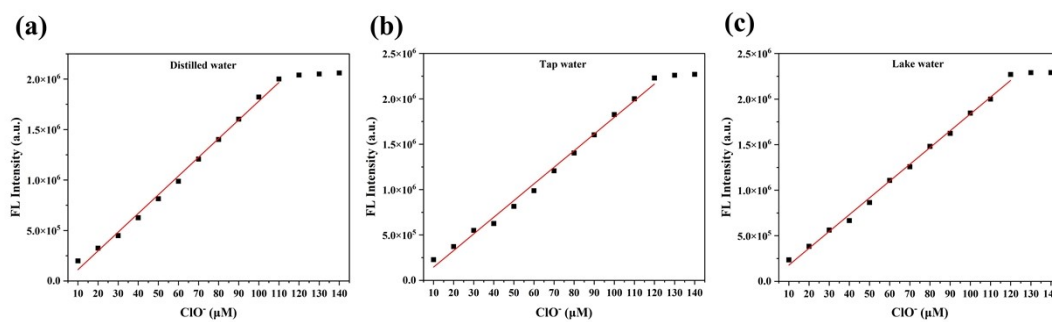

**Fig. S6** Linear relationship between fluorescence intensity of **DMTI** at 460 nm against  $\text{ClO}^-$  concentration (0–140  $\mu\text{M}$ ) in distilled water (a), tap water (b), and lake water (c).
